# Supplementary material for: The Influence of Land Use in the Catchment Area of Small Waterbodies on the Quality of Water and Plant Species Composition
Source: Research Square preprint supplement (doi:10.21203/rs.3.rs-1144902/v1), 2021-12-20
Supplement: Supplementary file 1 [file 0022e3ca8a691838a6e7ad21.docx]

| **Question:**  Which zone has the greatest impact on water quality and plant species composition in the waterbody?  Which use has the greatest negative and which positive impact? | 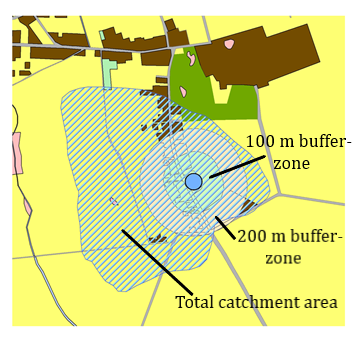 | **Result:**  100 m buffer-zone  The greatest negative impact: arable land and built-up areas, while the positive: bushy areas, extensively used orchards and perennial vegetation |
| --- | --- | --- |
